# Supplementary material for: Plasmon enhanced photocurrent in strongly coupled Ag@perylene core–shell nanowires
Source: Royal Society of Chemistry journal article supplement (doi:10.1039/c5ta01772f), 2015-01-01
Supplement: c5ta01772f1.pdf [file c5ta01772f1.pdf]

## **Supporting Information**

### **Plasmon Enhanced Photocurrent in Strong Coupling Ag@Perylene**

#### **Core-Shell Nanowires**

Ling Lin<sup>a</sup>, Gui-Qi Gao<sup>a, b</sup>, Qing Zhu<sup>a</sup>, An-Wu Xu<sup>\*a</sup>

<sup>a</sup>Division of Nanomaterials and Chemistry, Hefei National Laboratory for Physical Sciences at Microscale, University of Science and Technology of China, Hefei 230026, China

<sup>b</sup>Modern Experiment Technology Center, Anhui University, Hefei, Anhui 230601, P. R China.

\*To whom correspondence should be addressed.

Email: [anwuxu@ustc.edu.cn](mailto:anwuxu@ustc.edu.cn)

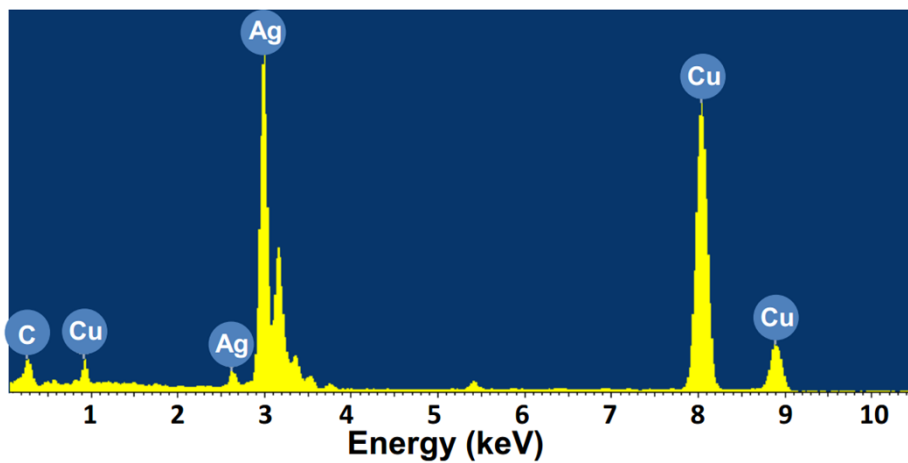

**Figure S1.** EDS spectrum for Ag@Pe-5.8 nm sample.

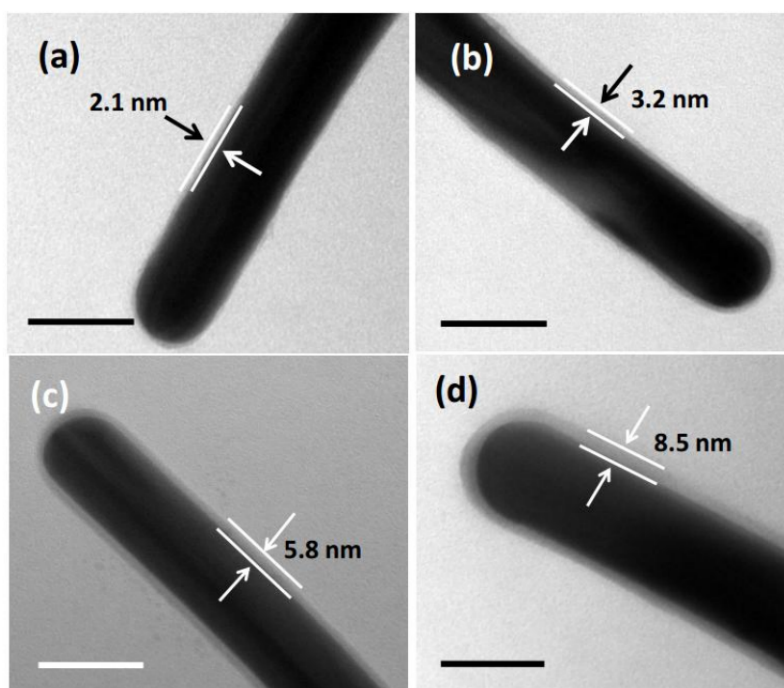

**Figure S2.** Typical TEM images of Ag@Pe nanostructures prepared with different amounts of injected  $\text{Pe}^{+}$ . (a) 0.05 mL (b) 0.1 mL (c) 0.15 mL (d) 0.20 mL M  $\text{Pe}^{+}$  acetonitrile solution.

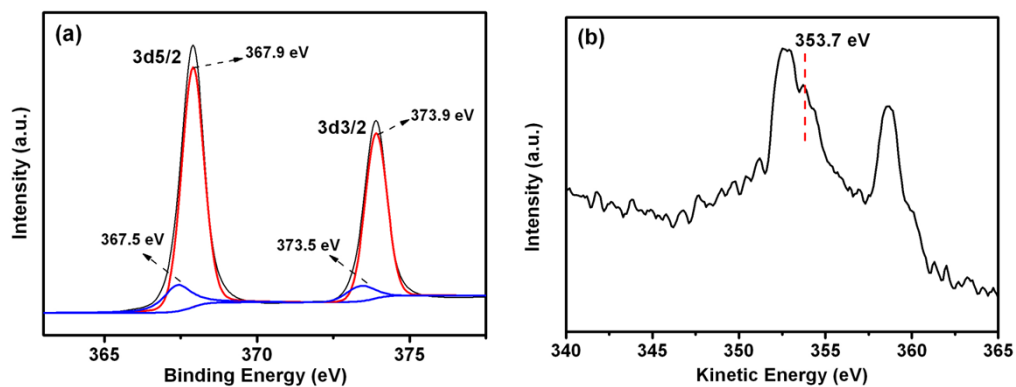

**Figure S3.** Ag 3d (a) and Ag MNN (b) spectra of Ag@Pe-5.8 nm sample.

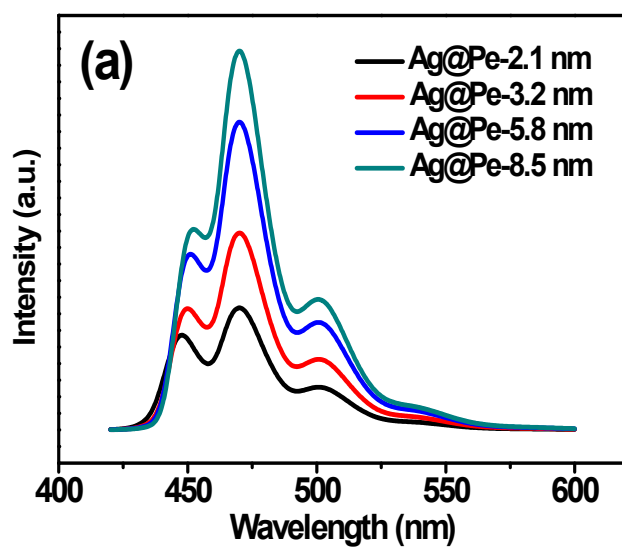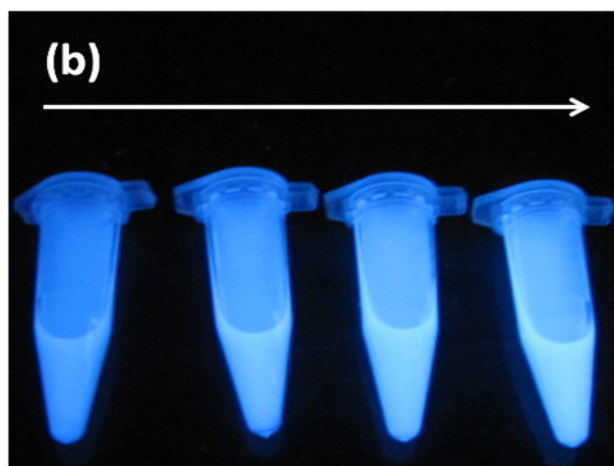

**Figure S4.** Fluorescence spectra (a) and photographs under UV light irradiation of Ag@Pe samples with different shell thickness.

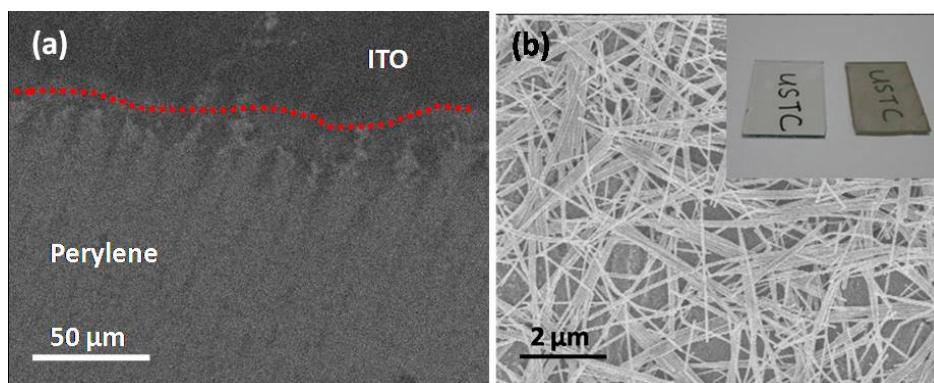

**Figure S5.** (a) SEM image of perylene film. (b) Ag@Pe-5.8 nm on ITO substrate for photocurrent measurement. Inset: photographs of ITO substrates before (left) and after (right) drop-casting of Ag@Pe-5.8 nm.

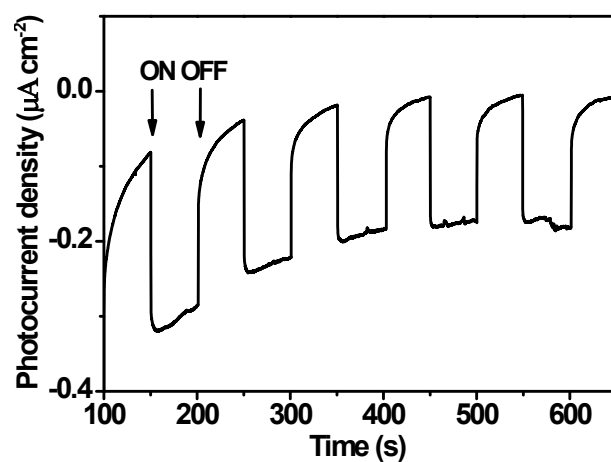

**Figure S6.** Photocurrent of pure Ag NWs on ITO substrate.

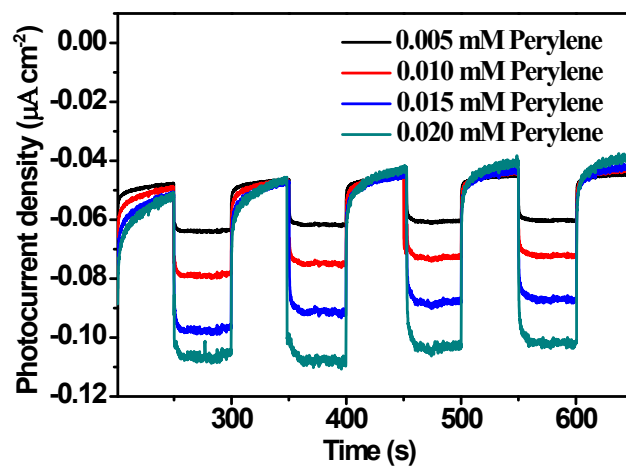

**Figure S7.** Photocurrent of perylene with different amount.
